# Supplementary material for: Can strand displacement take place in DNA triplexes?
Source: Royal Society of Chemistry journal article supplement (doi:10.1039/c7ob02871g), 2017-12-21
Supplement: c7ob02871g1.pdf [file c7ob02871g1.pdf]

## Can Strand Displacement Take Place in DNA Triplex?

Qian Li, Cheng Tian, Xiang Li & Chengde Mao\*

Department of Chemistry, Purdue University, West Lafayette, IN 47907, USA

[mao@purdue.edu](mailto:mao@purdue.edu)

### Supporting Information

#### Experimental Methods.

**Oligonucleotides.** All strands were purchased from Integrated DNA Technologies, Inc. and used without further purification. DNA Sequences:

H strand: 5'-TTCCTTTCTCCTTCTTTAACTATTTTCTTCCTCTTTCCTTGTTACAT  
TGCACACT-3';

S strand: 5'-AAGGAAAGAGGAAGAAAA-3';

M strand: 5'-AGTGTGCAATGTAACAAGGAAAGAGGA-3';

L strand: 5'-AGTGTGCAATGTAACAAGGAAAGAGGAAGAAAA-3.

**Formation of DNA complexes.** 2  $\mu$ M DNA (H+S) or (H+M) or (H+L) were prepared in TAE/Mg<sup>2+</sup> buffer [containing 40 mM Tris, 20 mM acetic acid, 2 mM EDTA, and 12.5 mM Mg(CH<sub>3</sub>COO)<sub>2</sub>, pH 8.0] by cooling the DNA solution from 95 °C to room temperature for 2 hrs. For triplex strand displacement, pH of the duplex solution was adjusted to 5.0 by adding 1.0 M HCl, and then equal molar of invading strand L was added to the solution.

**Native gel electrophoresis.** 15% native polyacrylamide (19:1 acrylamide/bisacrylamide) gel was run at room temperature at pH=8.0 (TAE/Mg<sup>2+</sup> buffer) or pH=5.0 [containing 20 mM acetic acid, 2 mM EDTA, and 12.5 mM Mg(CH<sub>3</sub>COO)<sub>2</sub>, pH 8.0]. After electrophoresis, the gels were stained with Stains-All (Sigma) and scanned with an HP scanner. Please note that strand displacement was not stopped and could continue during electrophoresis.

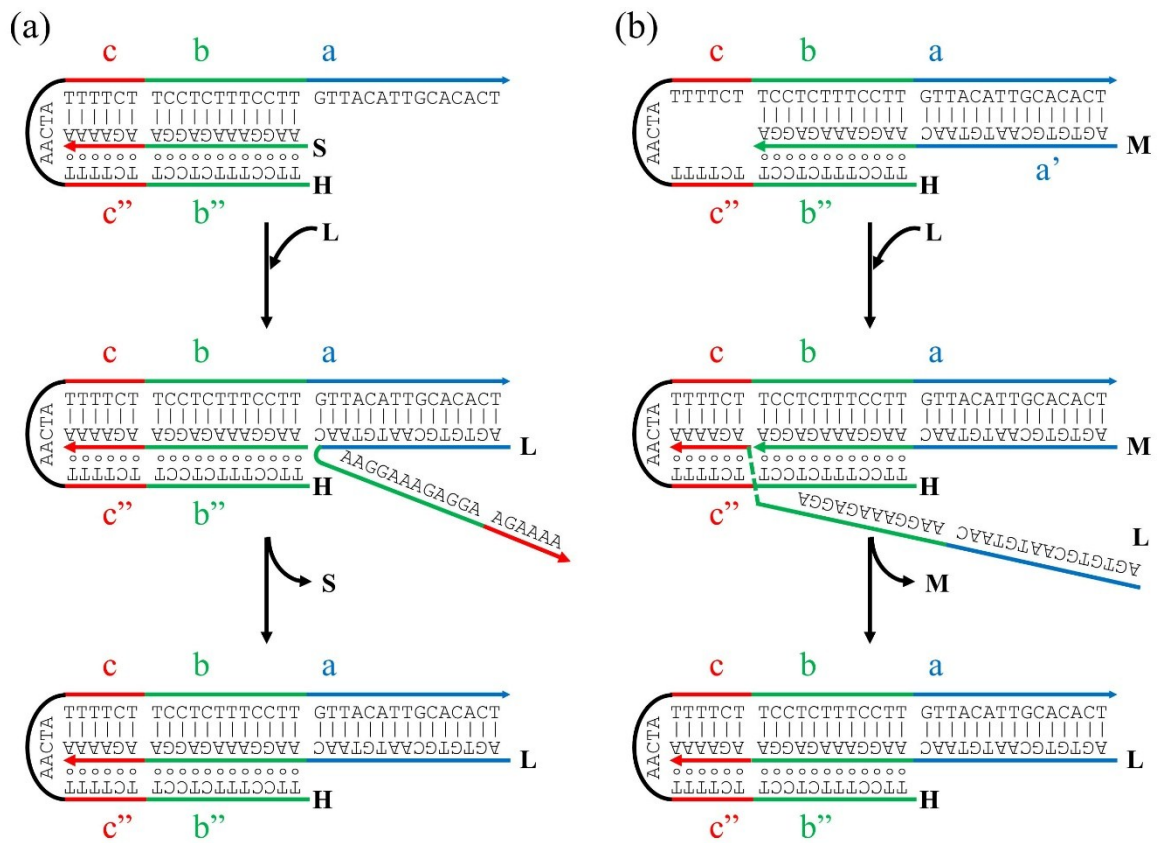

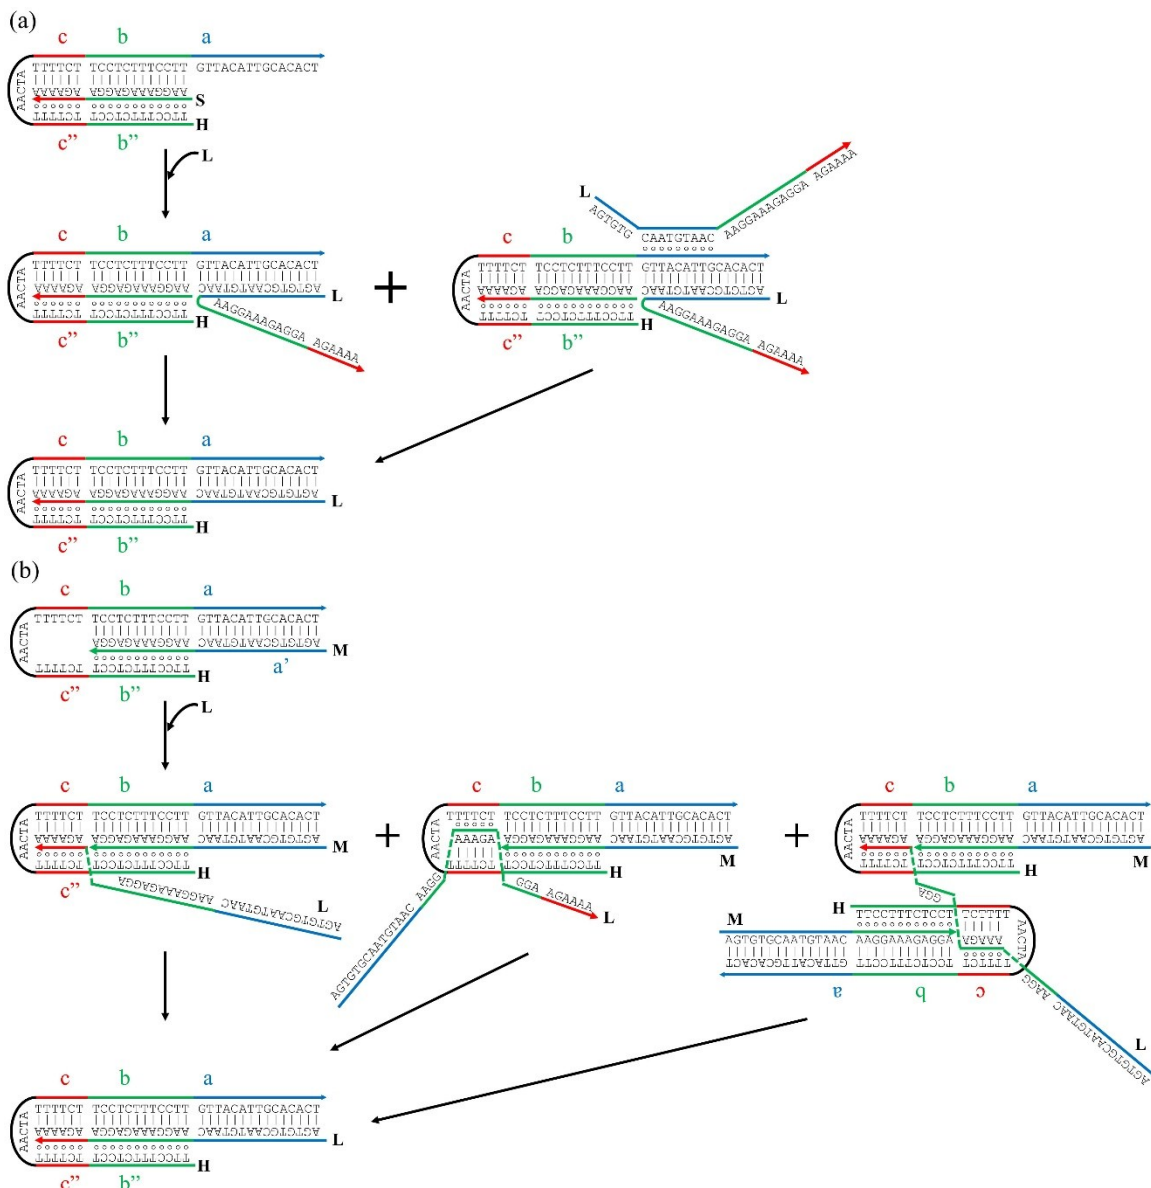

**Figure S2. Schemes of side reactions of strand displacement for system 1 (a) and system (2) at pH 5.0.**
